# Supplementary material
Source: publisher figshare collection journal article supplement (https://tandf.figshare.com/ndownloader/files/17889674)
Supplement: Supplementary file 1 [file 17889674]

**Anti-miRNA21 and Resveratrol loaded polysaccharide-based mesoporous silica  
nanoparticle for synergistic activity in Gastric Carcinoma**

Yu Hu<sup>1#</sup>, Zhehui Wang<sup>1#</sup>, Yunfeng Qiu<sup>2</sup>, Yang Liu<sup>2</sup>, Meng Ding<sup>2\*</sup>, Ying Zhang<sup>2\*</sup>

<sup>1</sup>Department of pathology, China-Japan Union Hospital of Jilin University, Changchun, Jilin, China, 130033

<sup>2</sup>Department of Endoscopy Center, China-Japan Union Hospital of Jilin University, Changchun, Jilin, China, 130033

<sup>#</sup>These two authors contribute to this work equally.

<sup>\*</sup>Both of these two authors are corresponding author

**\*Corresponding author:**

Meng Ding,  
Department of Endoscopy Center,  
China-Japan Union Hospital of Jilin University,  
Changchun, Jilin, China, 130033  
Tel&Fax: 0086-0431-84995534  
Email: DigbyIzolamozn@yahoo.com

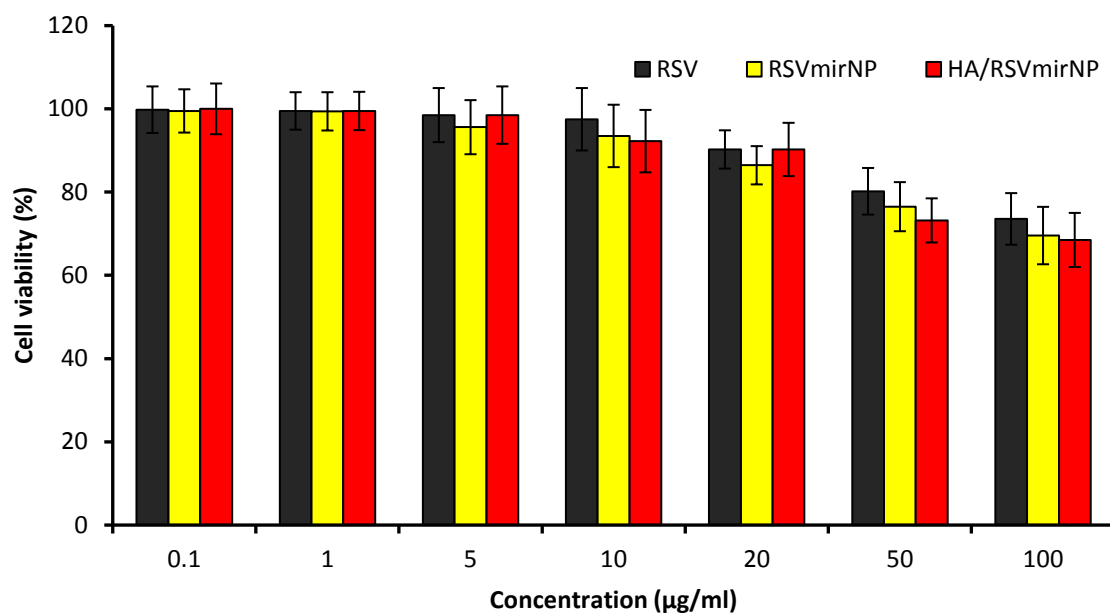

**Figure S1:** Cell viability analysis of different formulations on normal gastric cells (GES-1). The cell viability was evaluated by MTT assay after incubating with respective formulations for 24h.
